# Supplementary material
Source: PubMed Central journal article supplement (PMC7888190)
Supplement: mmc4.pdf [file mmc4.pdf]

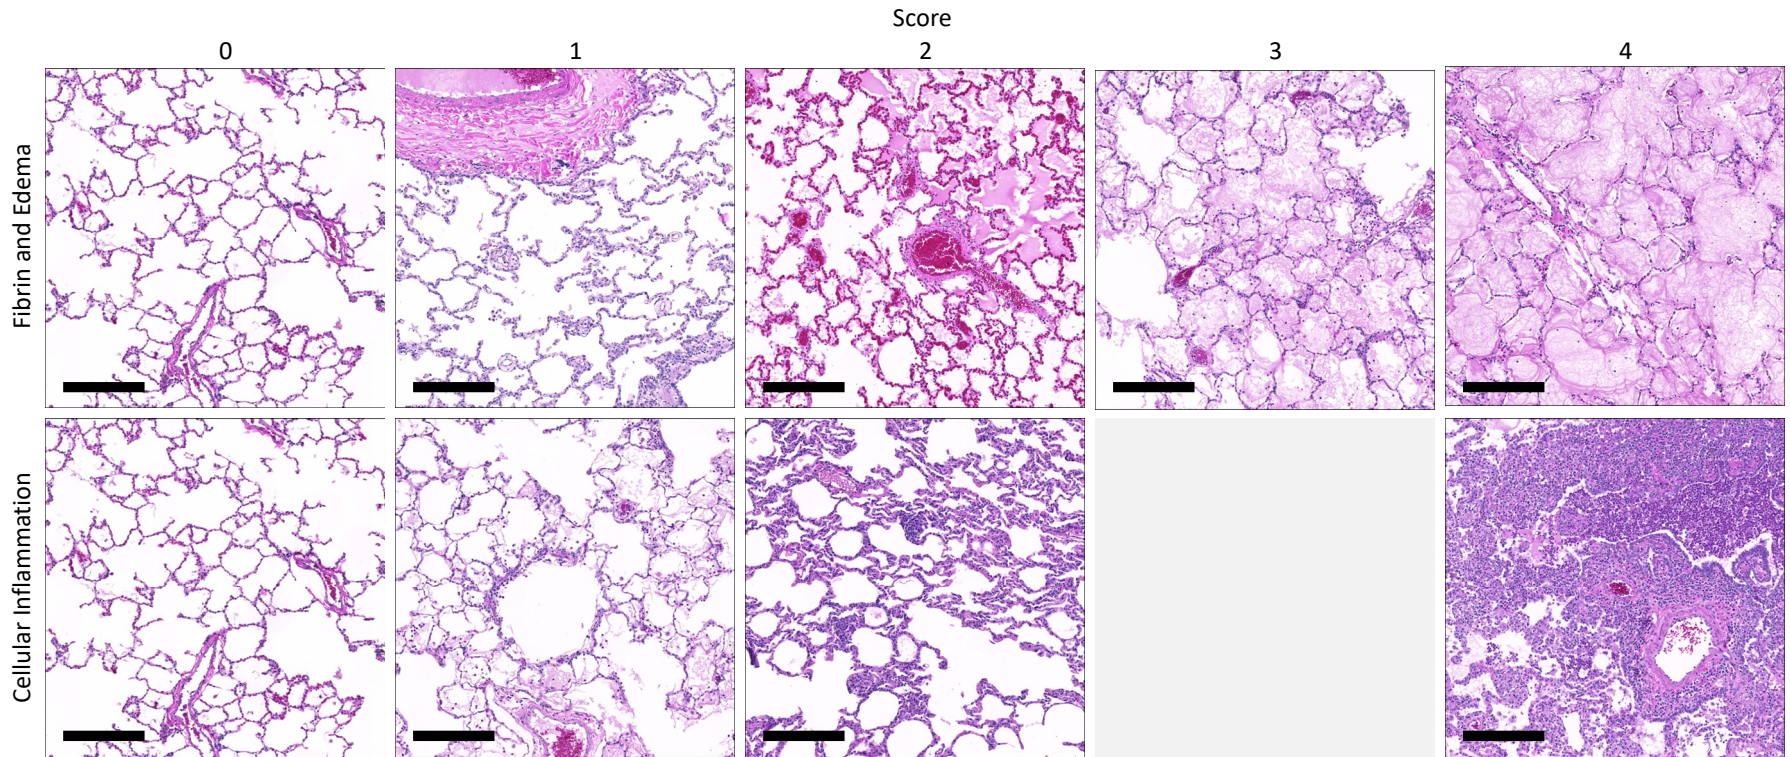

**Fibrin and Edema Score**

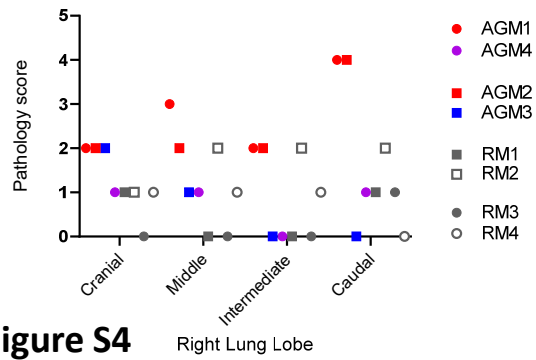

**Cellular Inflammation Score**

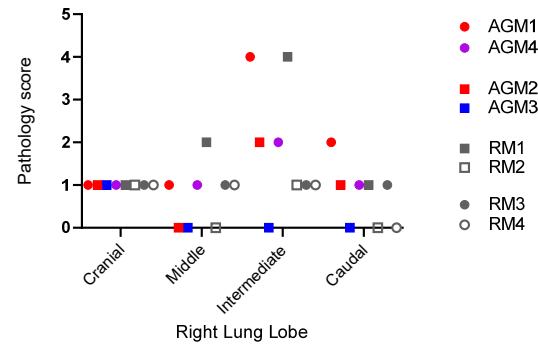

**Histopathologic Score**

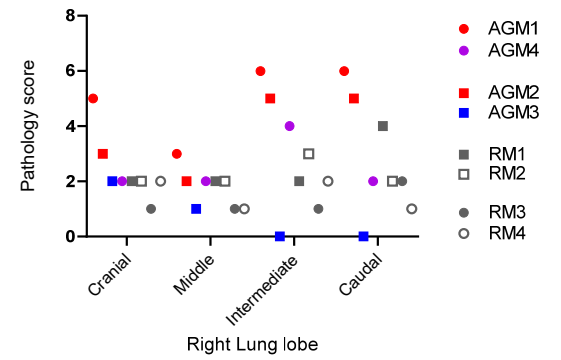

**Supplemental Figure S4**

Right Lung Lobe

Right Lung Lobe

Right Lung lobe
