# Supplementary material
Source: PubMed Central journal article supplement (PMC7888190)

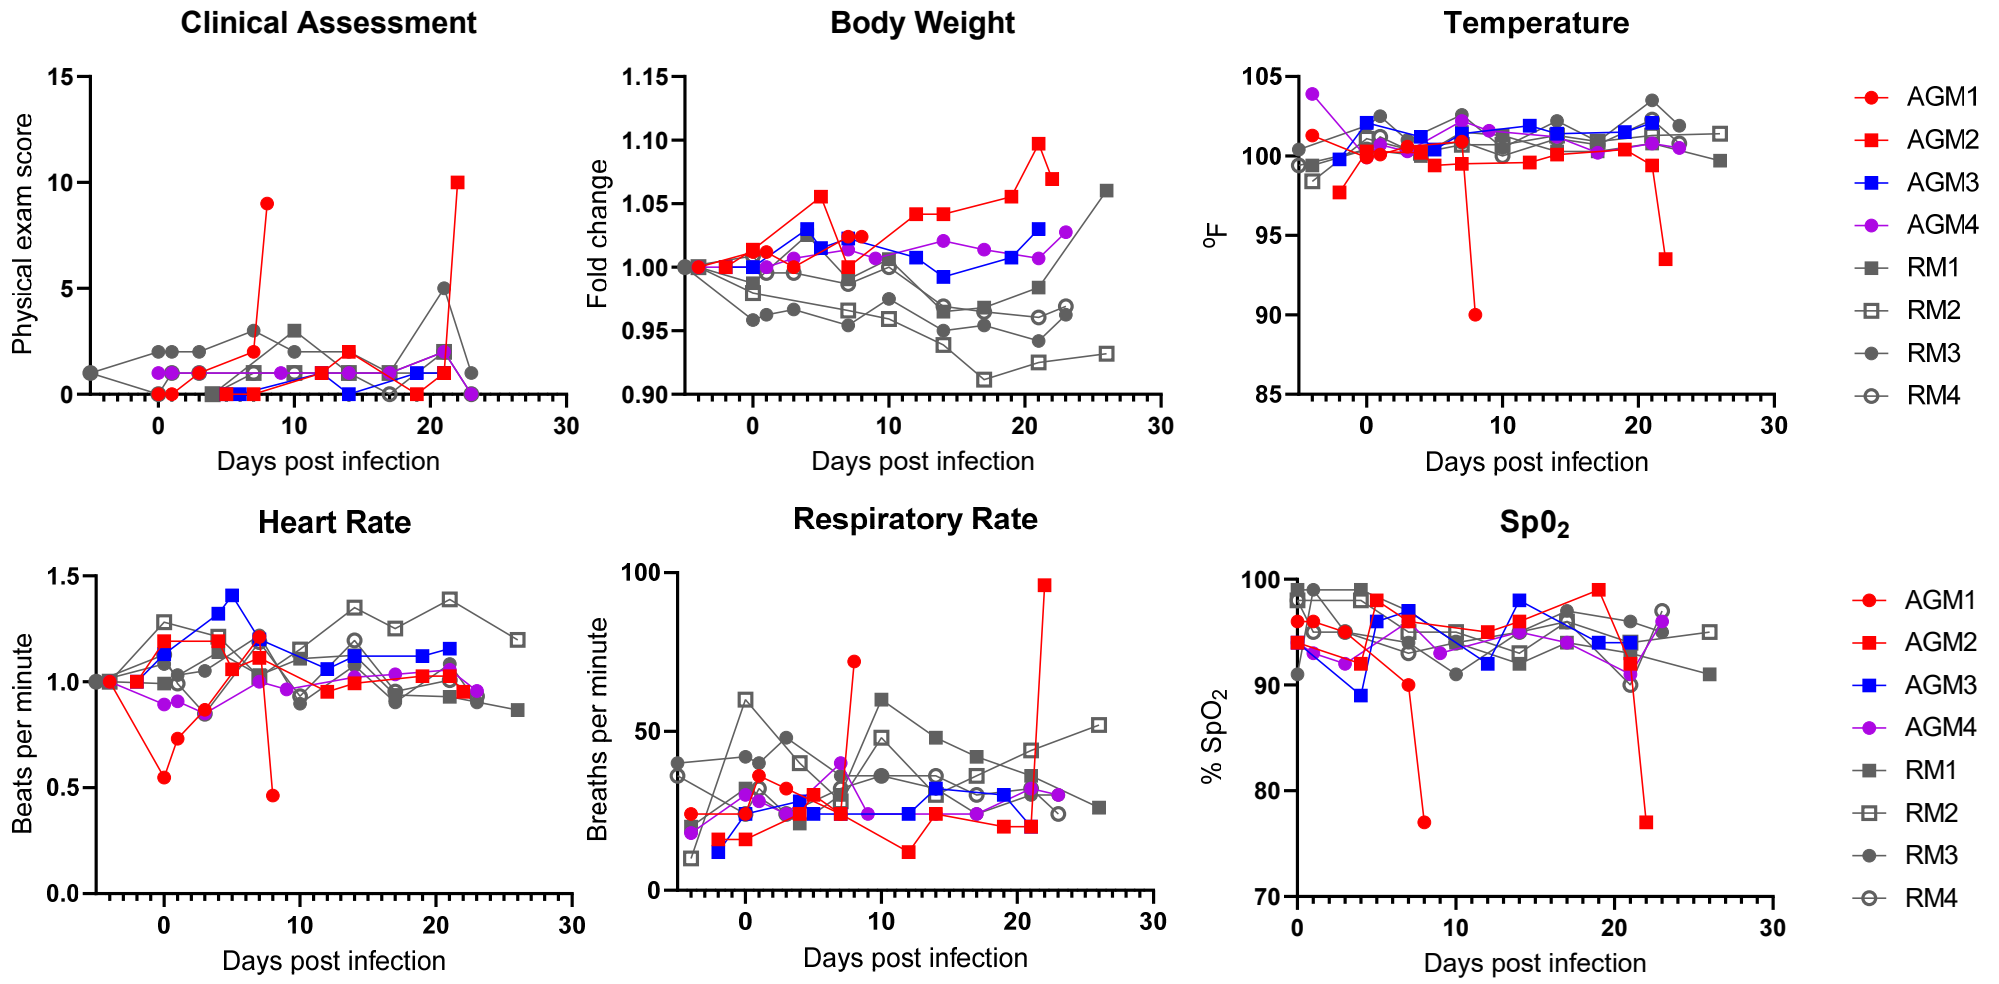

Supplemental Figure S1

Supplement: mmc1.pdf [file mmc1.pdf]

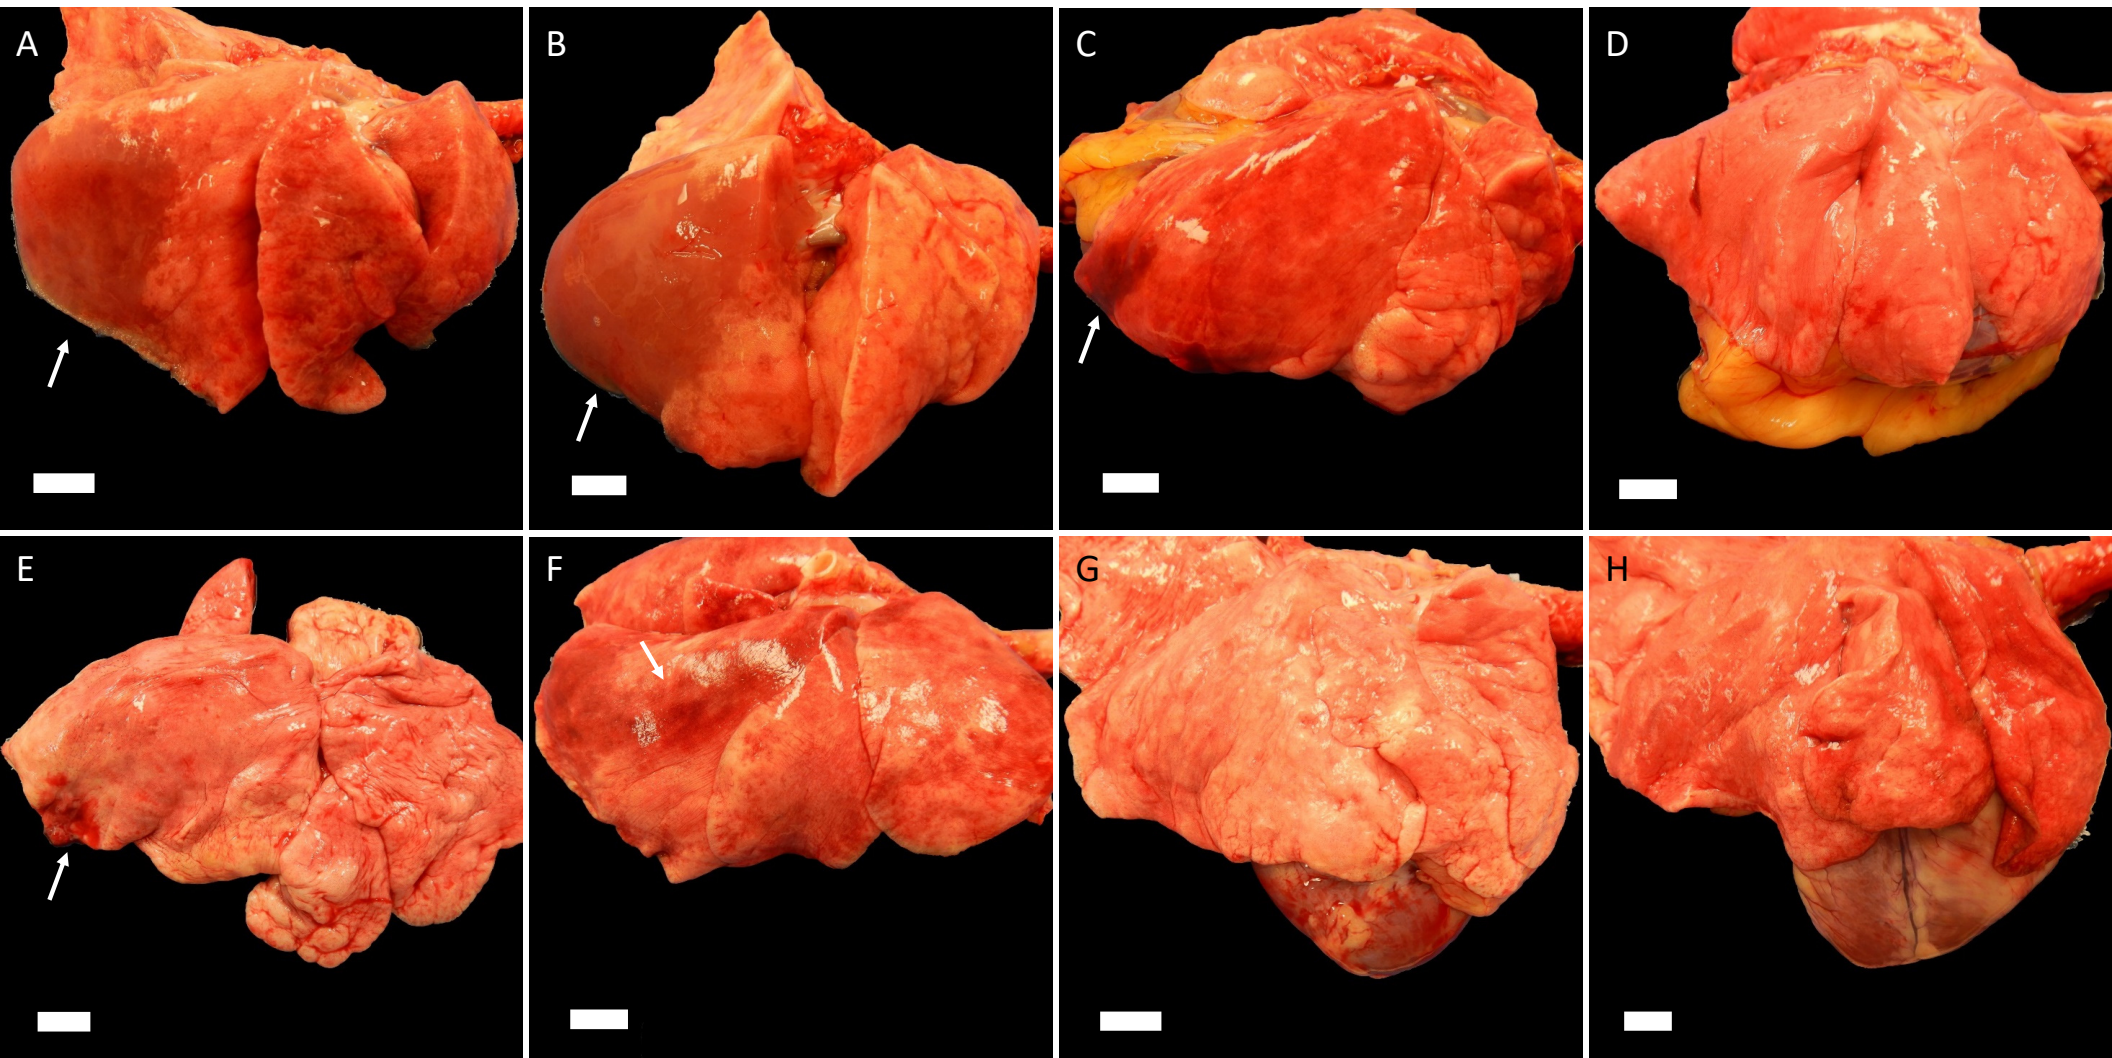

Supplemental Figure S2

Supplement: mmc2.pdf [file mmc2.pdf]

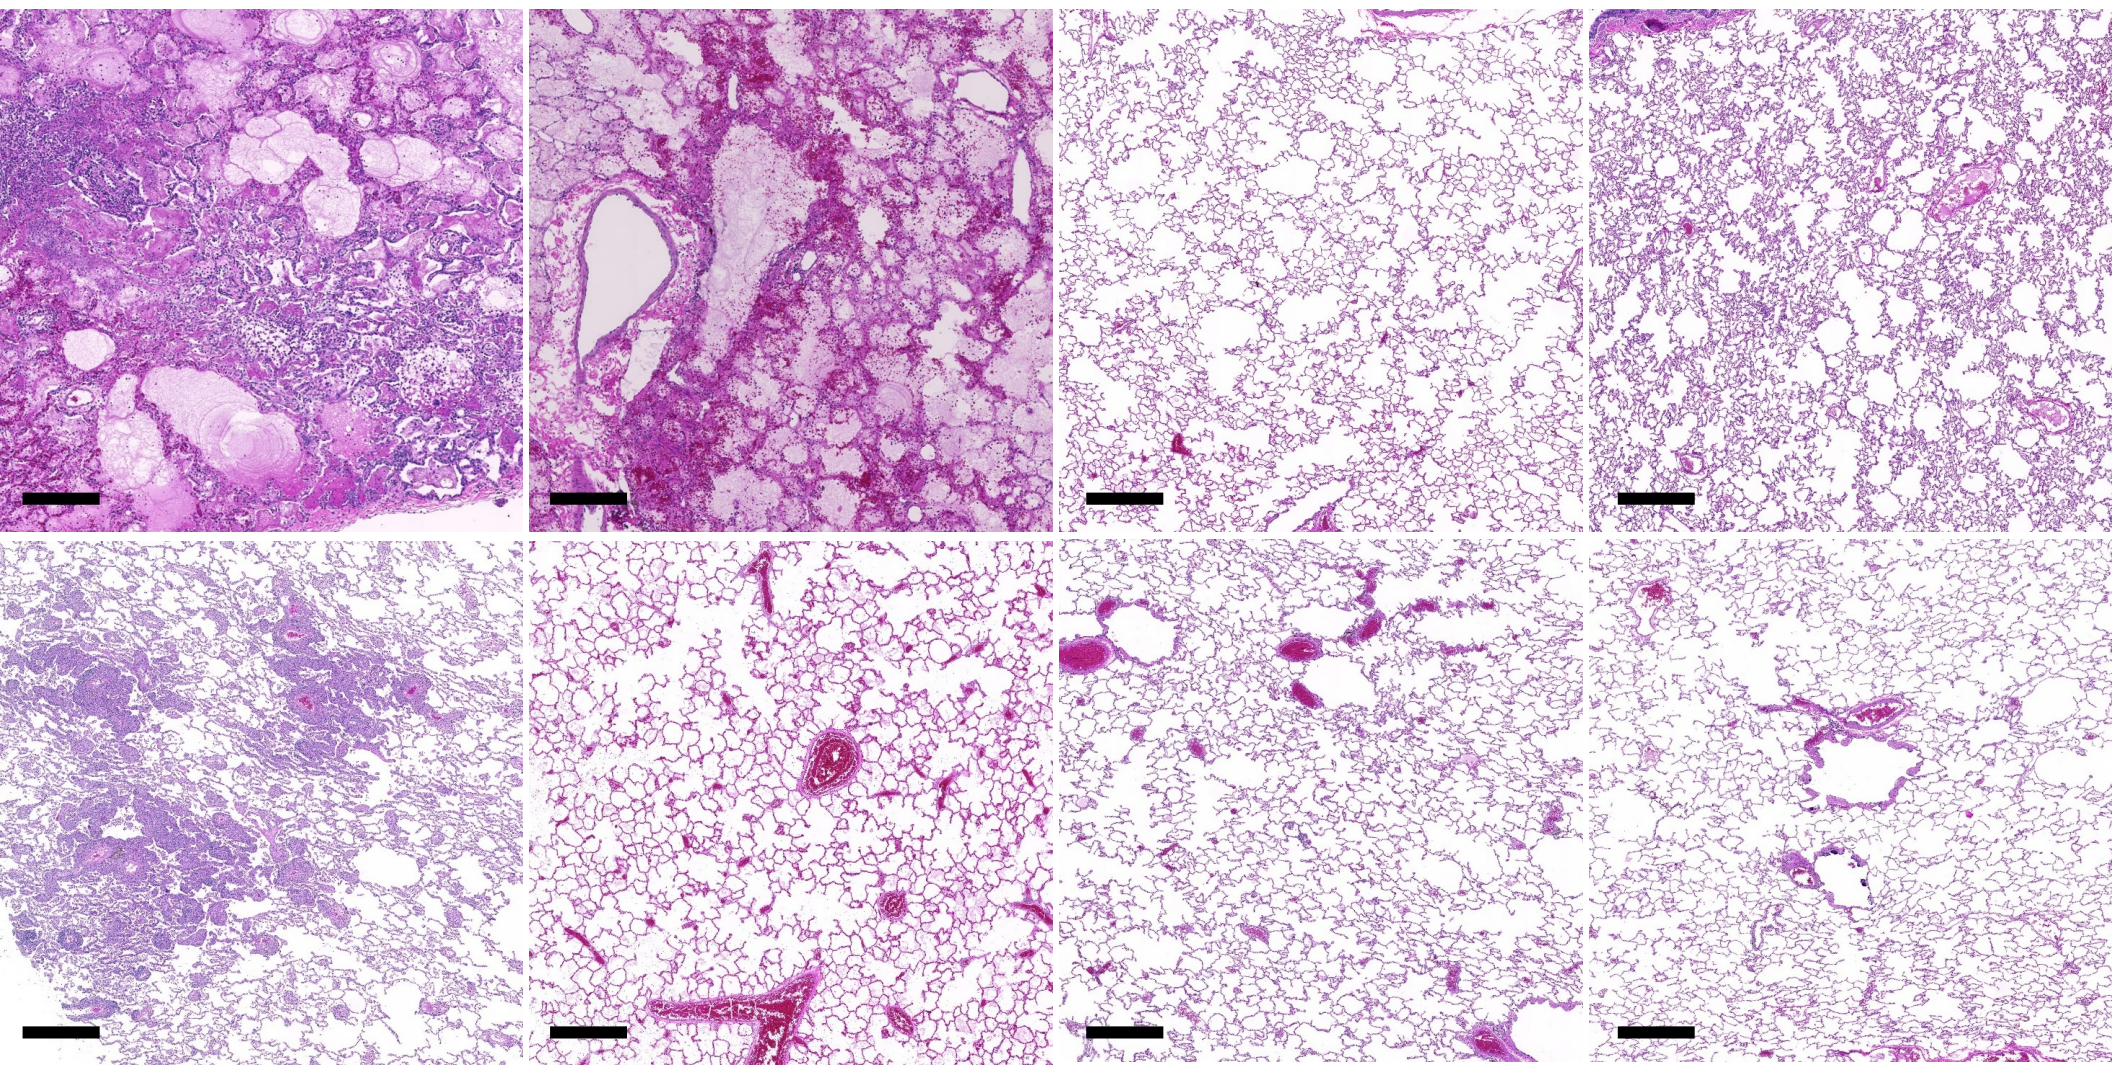

**Supplemental Figure S3**

Supplement: mmc3.pdf [file mmc3.pdf]

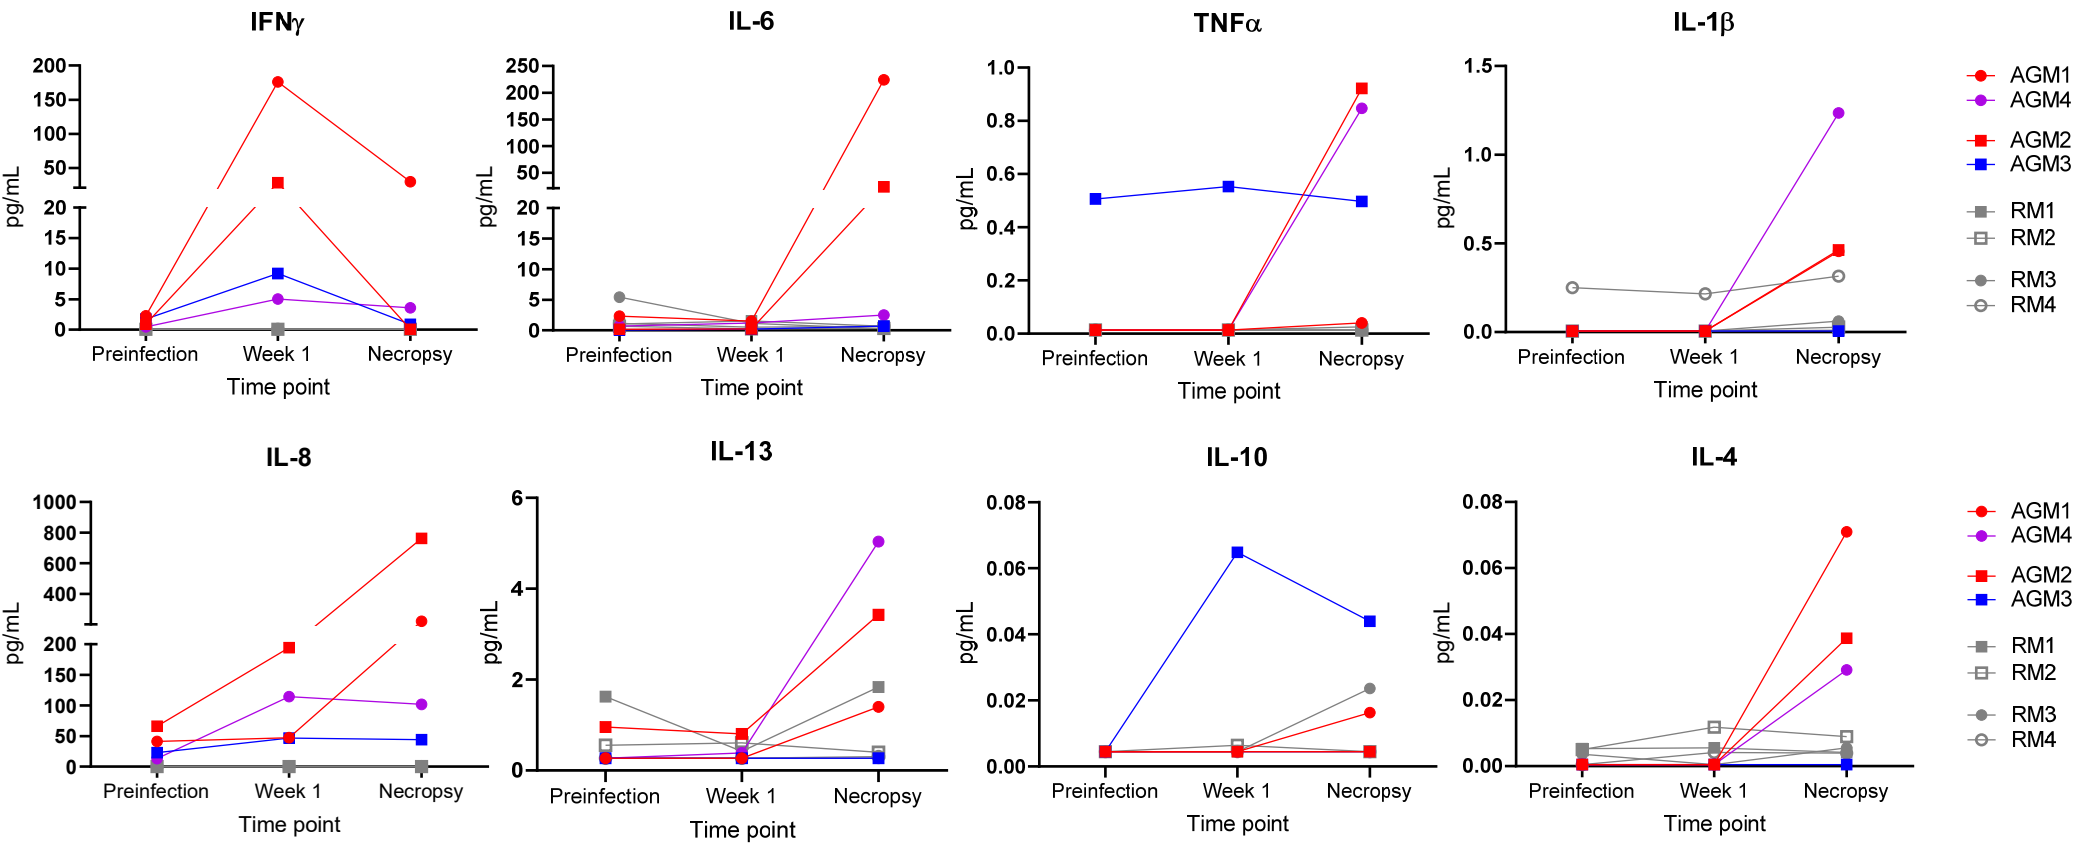

**Supplemental Figure S5**

Supplement: mmc5.pdf [file mmc5.pdf]

**IgG Binding Antibodies to CoV-2 Spike**

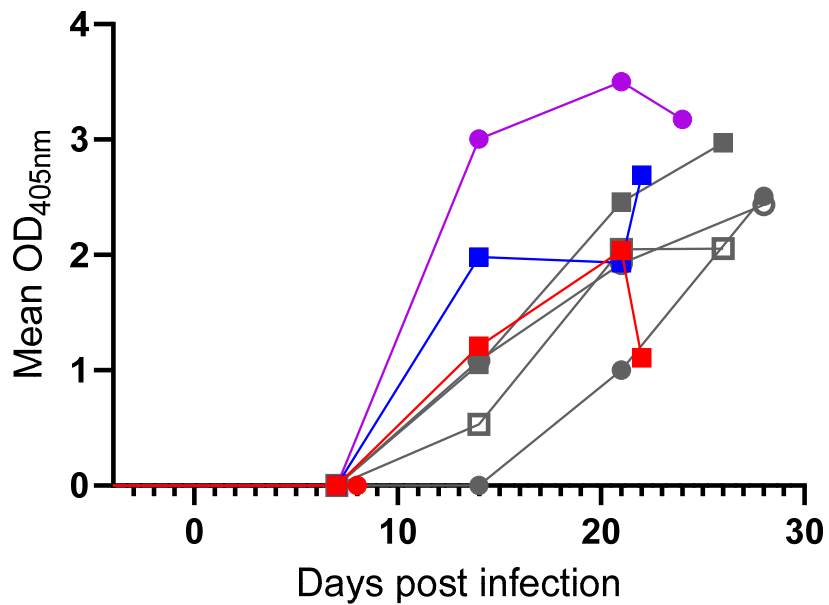

**IgG Binding Antibodies to CoV-2 NP**

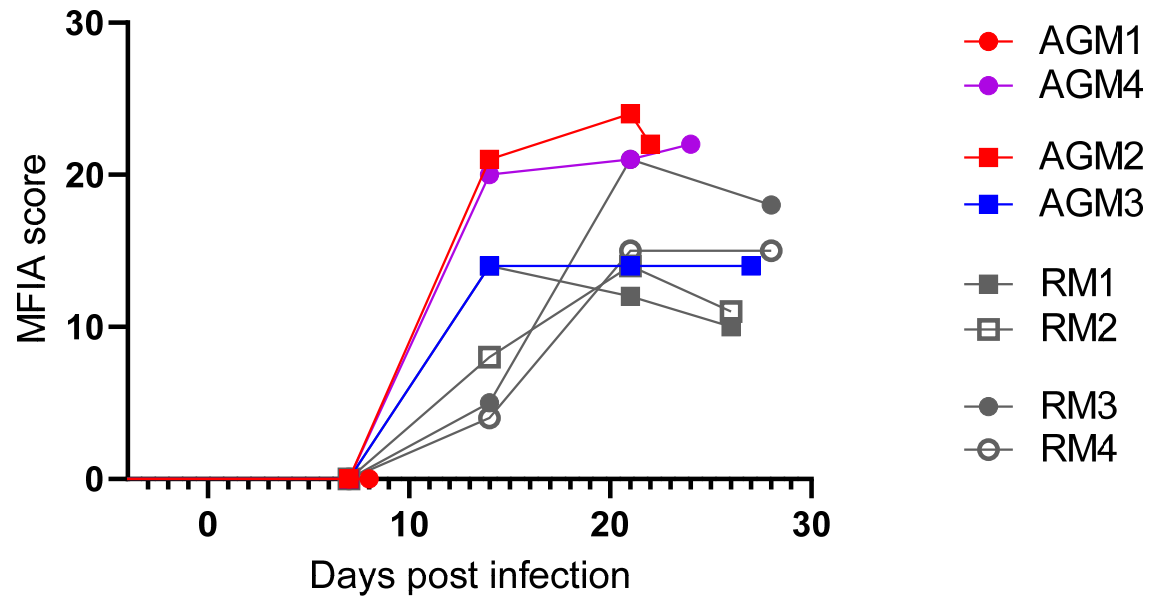

**Supplemental Figure S6**

Supplement: mmc6.pdf [file mmc6.pdf]
